# Supplementary material for: A Molecular View of the Surface Pressure/Area Per Lipid Isotherms Assessed by FTIR/ATR Spectroscopy
Source: MDPI journal article supplement (doi:10.3390/colloids6040054), 2022-10-11
Supplement: s1 [file s1]

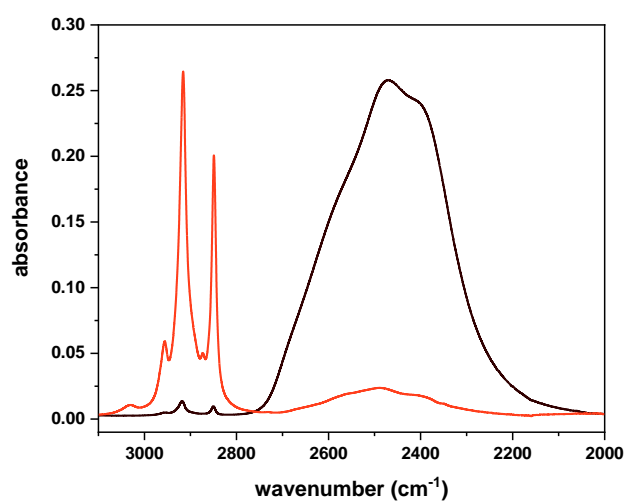

(a)

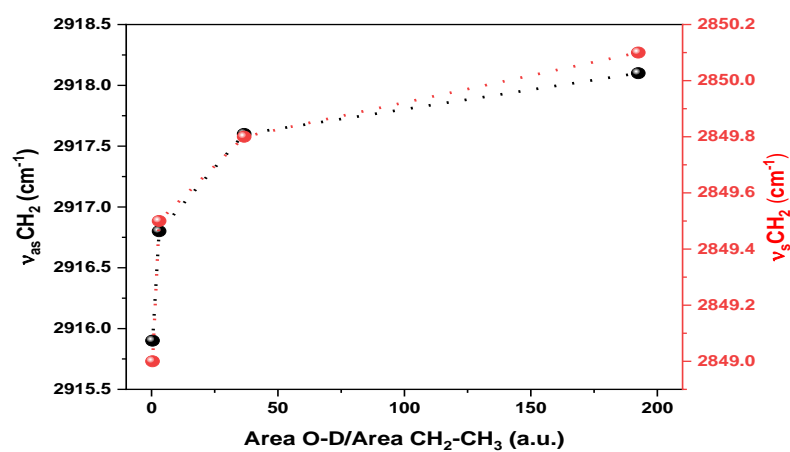

(b)

**Figure S1:** (a) Stretching bands of  $\text{CH}_2\text{CH}_3$  groups in the presence of  $\text{D}_2\text{O}$ . (b) Correspondence of asymmetric and symmetric  $\text{CH}_2$  stretching bands with  $a_w$ .
